# Supplementary material
Source: PubMed Central journal article supplement (PMC7181303)
Supplement: NIHMS1574528-supplement-Supplementary.pdf [file NIHMS1574528-supplement-Supplementary.pdf]

## **SUPPLEMENTARY FIGURES 1-3, TABLES 1-2**

### **JNK2 is required for tumorigenic properties of melanoma cells**

Lili Du<sup>1</sup>, Anna Anderson<sup>1</sup>, Kimberly Nguyen<sup>1,2</sup>, Sandra S. Ojeda<sup>1</sup>, Ivannie Ortiz-Rivera<sup>2</sup>, Tran Ngoc Nguyen<sup>1</sup>, Tinghu Zhang<sup>3,4</sup>, Tamer S. Kaoud<sup>5,6</sup>, Nathanael S. Gray<sup>3,4</sup>, Kevin N. Dalby<sup>5</sup>, Kenneth Y. Tsai<sup>1,2</sup>

<sup>1</sup>Department of Translational Molecular Pathology  
University of Texas MD Anderson Cancer Center, Houston, TX 77030

<sup>2</sup>Departments of Anatomic Pathology and Tumor Biology  
Moffitt Cancer Center, Tampa, FL 33612

<sup>3</sup>Department of Cancer Biology, Dana-Farber Cancer Institute, Boston MA

<sup>4</sup>Department of Biological Chemistry and Molecular Pharmacology, Harvard Medical School, Boston, MA

<sup>5</sup>Division of Chemical Biology and Medicinal Chemistry  
College of Pharmacy  
University of Texas at Austin, Austin, TX 78712

<sup>6</sup>Department of Medicinal Chemistry, Faculty of Pharmacy, Minia University, 61519  
Minia, Egypt

#### **Corresponding Author:**

Kenneth Y. Tsai, MD, PhD  
Moffitt Cancer Center  
12902 Magnolia Dr, SRB-4  
Tampa, FL, 33612

(813) 745-4864  
kenneth.tsai@moffitt.org



**Supplementary Figure 1. JNK1/2<sup>C116S</sup> mutants retain signaling to c-JUN in the presence of pan-JNK inhibition with JNK-IN-8.**

Western blots for c-JUN activity (phospho-c-JUN) and total c-JUN are probed for each of the 501MEL cell lines transduced with JNK1<sup>WT</sup> / JNK1<sup>C116S</sup> (top) and JNK2<sup>WT</sup> / JNK2<sup>C116S</sup> (bottom). The lines were sham irradiated or UV-irradiated (18.5 kJ/m<sup>2</sup>; Newport, UV-SOL) in the presence or absence (DMSO) of 1 micromolar JNK-IN-8 and protein lysates procured 1 hour later.

In the JNK1/2<sup>WT</sup> transduced lines, phospho-c-JUN is suppressed by JNK-IN-8 following irradiation. Both JNK1<sup>C116S</sup> and JNK2<sup>C116S</sup> expressing cells continue to signal to c-JUN even in the presence of JNK-IN-8, showing that these mutants retain the ability to activate downstream targets even in the presence of the inhibitor.

Supplementary Figure 2

**A.**

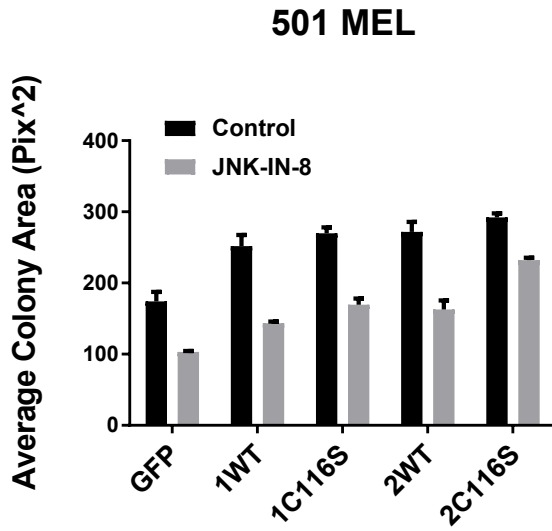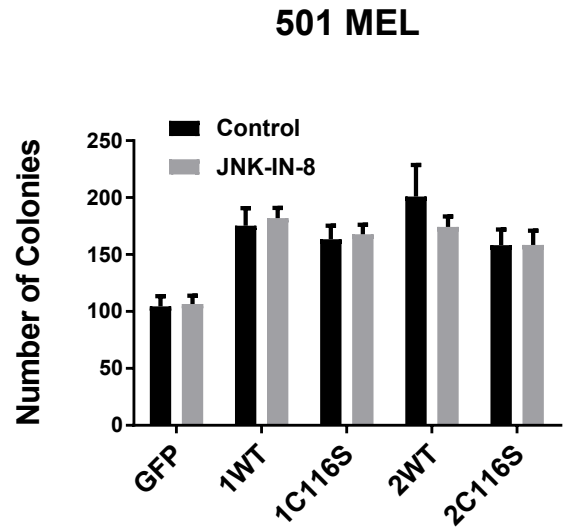

**B.**

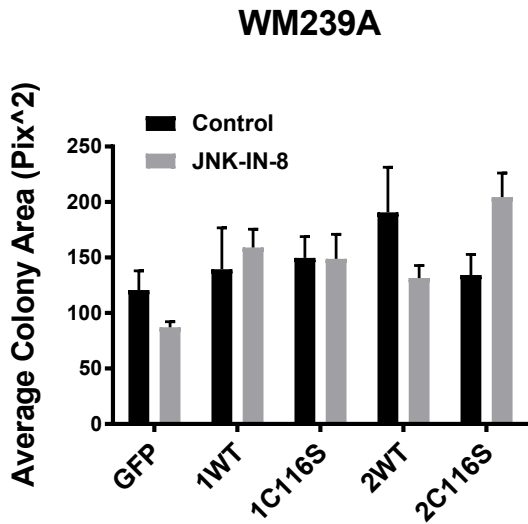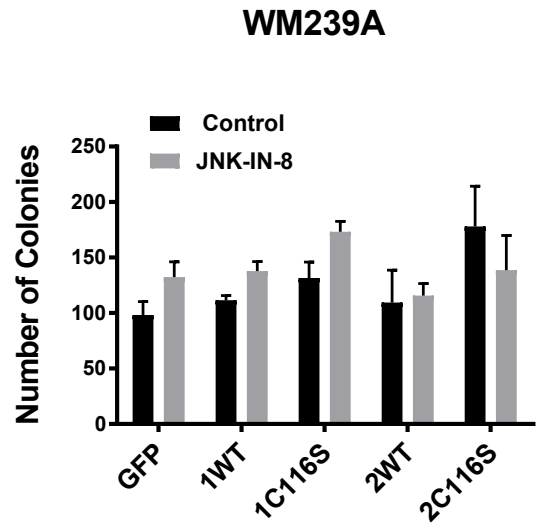

**C.**

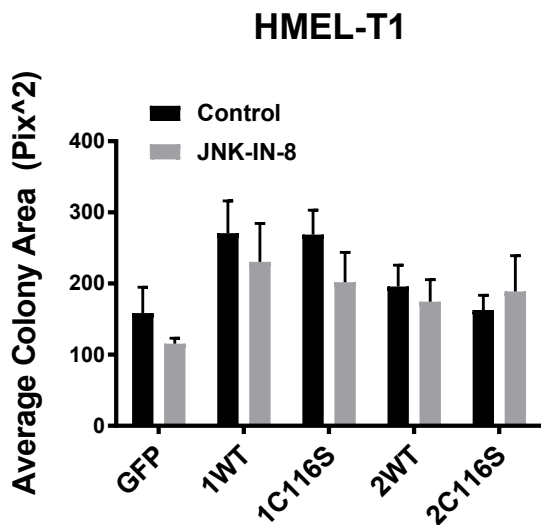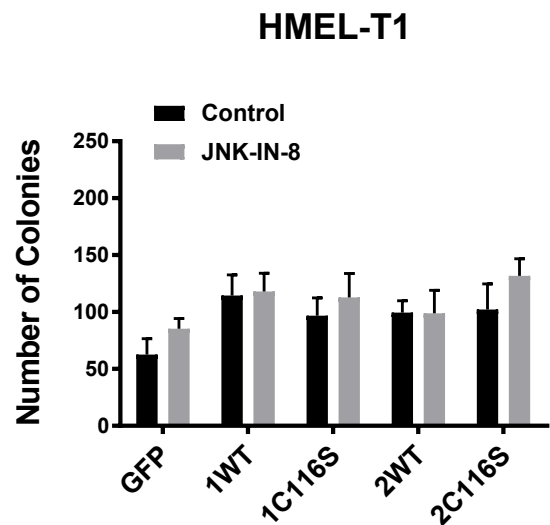

**Supplementary Figure 2. Effects of JNK-IN-8 on long term colony proliferation in cells transduced with JNK1/2<sup>WT</sup> and JNK1/2<sup>C116S</sup> alleles.**

Results of average colony area (left) and total colony counts (right) are shown for 501MEL (A), WM239A (B), and HMEL-T1 (C) cells. The number of colonies is not dramatically affected by inhibitor within each line tested, but the average colony area is most differentially affected in the responses to inhibitor in JNK1<sup>C116S</sup> vs. JNK2<sup>C116S</sup>-expressing cells, in which JNK1 and JNK2 activity are most effectively isolated. This is most apparent when expressed as a ratio between control-treated and inhibitor-treated cells (Figure 2) and the contrast between JNK2<sup>C116S</sup>-expressing cells and the other lines is most apparent.

A.

### 501MEL

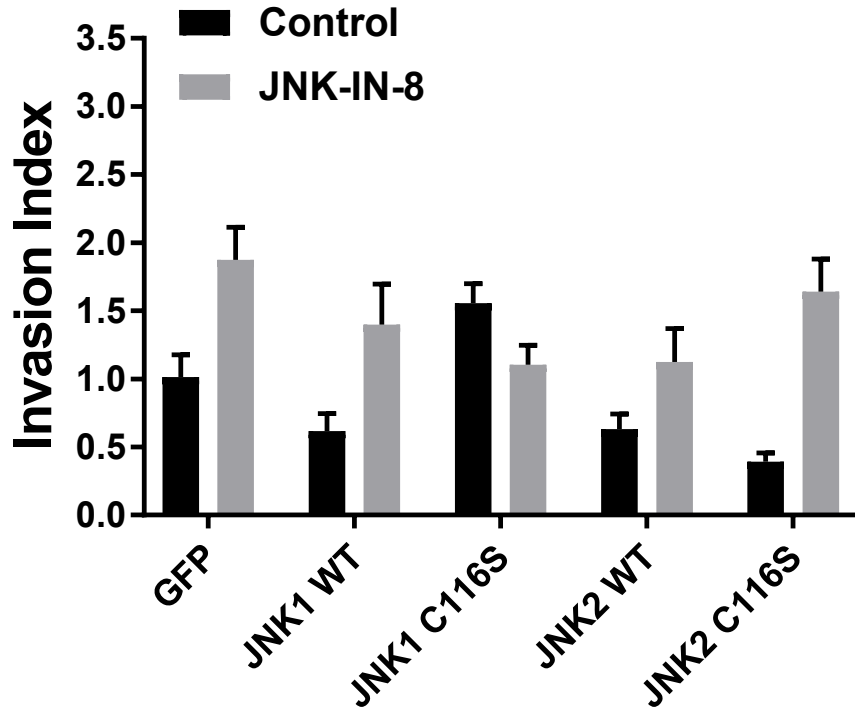

B.

### HMEL-T1

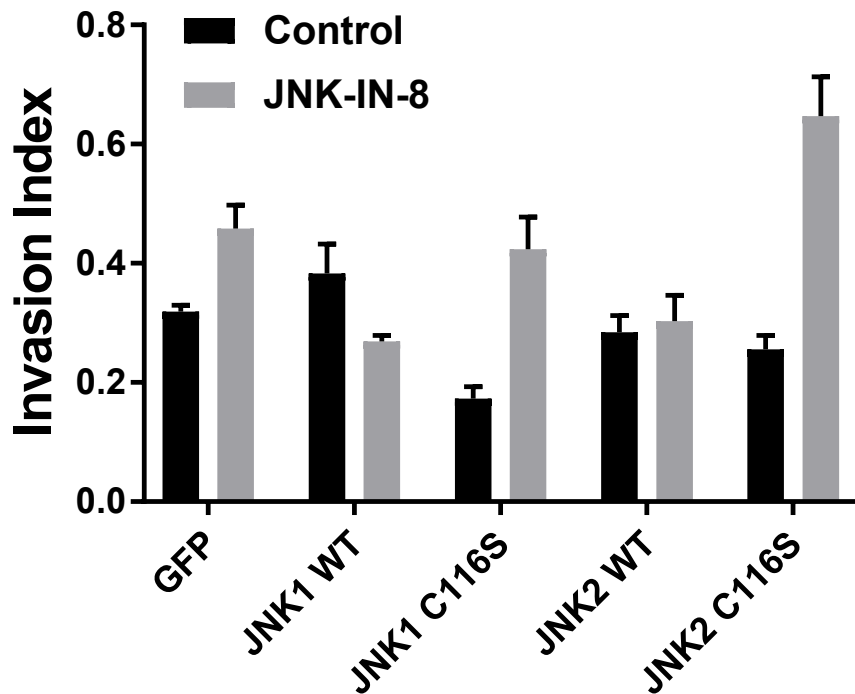

**Supplementary Figure 3. Effects of JNK-IN-8 on cellular invasiveness in cells transduced with JNK1/2<sup>WT</sup> and JNK1/2<sup>C116S</sup> alleles.**

Results of cellular invasiveness (invasion index) are shown for 501MEL (A) and HMEL-T1 (B) cells. The invasiveness is variably affected by transduction of individual WT and mutant isoforms; however the effect of adding JNK-IN-8 leads to a baseline increase in invasiveness in control (GFP) cells. This may be due to the relative biological importance of JNK1 vs. JNK2 in this phenotype. Nevertheless, the invasion index is again most differentially affected in the responses to inhibitor in JNK1<sup>C116S</sup> vs. JNK2<sup>C116S</sup>-expressing cells, in which JNK1 and JNK2 activity are most effectively isolated. This is most apparent when expressed as a ratio between control-treated and inhibitor-treated cells (Figure 3) and the contrast between JNK2<sup>C116S</sup>-expressing cells and the other lines is most apparent.

Supplementary Table 1

| Gene name | Sample description    | JNK1 WT  | JNK1 mut | JNK1 WT  | JNK1 mut | JNK2 WT  | JNK2 mut | JNK2 WT  | JNK2 mut |
|-----------|-----------------------|----------|----------|----------|----------|----------|----------|----------|----------|
|           |                       | control  | control  | JNK-IN-8 | JNK-IN-8 | control  | control  | JNK-IN-8 | JNK-IN-8 |
|           |                       | Avg      |
|           | 4-Oct Oct-4-R-C       | 1.069079 | 0.991485 | 1.021365 | 1.03817  | 1.023362 | 0.974439 | 0.985093 | 1.056139 |
| ABL1      | c-Abl-R-V             | 0.991675 | 0.925113 | 1.013943 | 0.977489 | 1.009527 | 0.987535 | 0.951644 | 1.018352 |
| ACACA     | ACC1-R-C              | 0.935339 | 0.956979 | 0.948382 | 0.972683 | 1.091016 | 1.024019 | 1.042933 | 0.959996 |
| ACACA     | ACC_pS79-R-V          | 1.046736 | 1.053976 | 1.039574 | 0.928154 | 1.006983 | 1.076242 | 0.996058 | 0.99069  |
| ACTB      | b-Actin-R-C           | 0.94067  | 1.159465 | 1.115981 | 1.193975 | 1.377734 | 1.069087 | 0.997189 | 1.381859 |
| AIM1      | Aurora-B-R-V          | 1.029827 | 0.973996 | 1.08744  | 0.994243 | 0.927699 | 0.914045 | 0.929064 | 1.025483 |
| AKT1      | Akt-R-V               | 0.948368 | 1.013486 | 1.044168 | 0.991079 | 1.058485 | 0.971105 | 0.938695 | 1.034459 |
| AKT1      | Akt_pS473-R-V         | 0.955434 | 1.045755 | 1.015748 | 1.143739 | 1.03582  | 1.015599 | 1.129229 | 1.066087 |
| AKT1      | Akt_pT308-R-V         | 0.921315 | 0.958539 | 1.010914 | 0.969138 | 1.018562 | 1.006831 | 1.111559 | 0.999312 |
| AKT1S1    | PRAS40_pT246-R-V      | 0.988518 | 0.954225 | 1.068931 | 1.057597 | 0.998471 | 1.003816 | 1.031528 | 1.020958 |
| AR        | AR-R-V                | 1.005651 | 1.178069 | 0.963259 | 1.016131 | 0.949949 | 0.94809  | 1.033345 | 0.955493 |
| ARAF      | A-Raf-R-V             | 0.974004 | 0.97337  | 0.917542 | 1.023716 | 1.062886 | 1.043862 | 0.9689   | 1.072598 |
| ARID1A    | ARID1A-R-C            | 1.109039 | 0.992407 | 1.194834 | 1.112878 | 0.922278 | 0.896634 | 0.972755 | 1.048037 |
| ATG3      | Atg3-R-V              | 1.032635 | 0.999886 | 1.055879 | 0.979778 | 1.071086 | 1.041092 | 0.993985 | 1.07872  |
| ATG7      | Atg7-R-V              | 1.031168 | 0.986384 | 1.028928 | 0.93543  | 1.113566 | 1.147426 | 1.119345 | 1.155125 |
| ATM       | ATM-R-V               | 1.028803 | 0.886059 | 0.96972  | 1.016791 | 1.051085 | 1.058042 | 0.961209 | 1.12239  |
| ATM       | ATM_pS1981-R-V        | 0.995309 | 0.895926 | 1.02614  | 0.97385  | 1.135337 | 0.980662 | 0.939891 | 1.080206 |
| ATR       | ATR_pS428-R-C         | 0.974303 | 0.931747 | 1.01633  | 0.894177 | 1.077086 | 1.145438 | 1.08329  | 1.139085 |
| ATRX      | ATRX-R-C              | 0.968042 | 0.989249 | 0.984106 | 1.043191 | 1.028519 | 1.061569 | 1.030814 | 0.916986 |
| AXL       | Axl-R-V               | 1.00677  | 1.064622 | 1.17601  | 1.078262 | 0.892573 | 0.950927 | 1.002415 | 0.852548 |
| BABAM1    | MERIT40_pS29-R-V      | 1.048779 | 0.908628 | 1.031248 | 1.08117  | 1.210674 | 1.10096  | 0.972006 | 1.117162 |
| BAD       | Bad_pS112-R-V         | 1.046221 | 1.052627 | 1.005597 | 1.048756 | 1.036726 | 1.070059 | 1.039715 | 0.995127 |
| BAK1      | Bak-R-C               | 1.120283 | 0.969714 | 0.968651 | 1.041621 | 1.017192 | 1.008655 | 1.028876 | 0.986803 |
| BAX       | Bax-R-V               | 1.053889 | 0.980879 | 0.909628 | 0.989033 | 1.026575 | 1.103977 | 1.0069   | 1.099085 |
| BCL2A1    | Bcl2A1-R-V            | 1.022093 | 0.950169 | 1.019133 | 1.012735 | 1.030962 | 1.057357 | 1.012259 | 1.0258   |
| BCL2L1    | Bcl-xL-R-V            | 1.142747 | 1.124092 | 0.925734 | 0.993646 | 0.929034 | 1.069835 | 1.004505 | 1.03     |
| BCL2L11   | Bim-R-V               | 1.054095 | 1.092919 | 0.998498 | 1.034626 | 1.136613 | 1.12629  | 1.071691 | 1.133512 |
| BECN1     | Beclin-G-C            | 1.057224 | 1.04232  | 1.17018  | 1.058041 | 1.225514 | 1.137249 | 1.066892 | 1.579121 |
| BID       | Bid-R-C               | 1.127735 | 1.028025 | 1.124163 | 1.100765 | 0.969057 | 1.027059 | 0.994984 | 1.006529 |
| BIRC3     | c-IAP2-R-C            | 0.999619 | 0.96592  | 1.058296 | 1.026969 | 1.066432 | 1.008032 | 0.975742 | 1.050603 |
| BRAF      | B-Raf-R-V             | 0.98697  | 0.993786 | 0.930746 | 0.97832  | 0.919957 | 0.963855 | 0.971193 | 0.94268  |
| BRAF      | B-Raf_pS445-R-V       | 0.961179 | 1.057196 | 1.036783 | 0.974395 | 0.93406  | 1.019287 | 1.011896 | 0.970523 |
| BRD4      | BRD4-R-V              | 1.122337 | 1.029078 | 1.157608 | 1.08333  | 0.855526 | 0.895629 | 0.98694  | 1.188567 |
| CASP3     | Caspase-3-R-C         | 1.079043 | 0.989352 | 0.982804 | 0.98807  | 0.986636 | 1.007401 | 0.992085 | 1.034098 |
| CASP7     | Caspase-7-cleaved-R-C | 1.289454 | 1.062973 | 0.997659 | 1.148316 | 1.228183 | 1.215233 | 0.986488 | 1.044161 |
| CAV1      | Caveolin-1-R-V        | 1.047417 | 0.886525 | 1.098516 | 1.129729 | 0.784642 | 0.882288 | 0.836614 | 1.140258 |
| CCNB1     | Cyclin-B1-R-V         | 1.06204  | 1.004181 | 1.150478 | 0.969344 | 0.884612 | 0.962595 | 0.938909 | 0.895214 |
| CCND1     | Cyclin-D1-R-V         | 1.000635 | 0.989925 | 1.012904 | 1.000697 | 1.120971 | 1.069812 | 1.008888 | 1.045391 |
| CD274     | PD-L1-R-C             | 1.318666 | 1.535693 | 3.054159 | 1.519197 | 1.443585 | 1.131378 | 1.292294 | 1.035061 |
| CDC25C    | cdc25C-R-V            | 0.979366 | 1.033888 | 1.137093 | 1.000646 | 0.948044 | 0.917615 | 1.050348 | 0.970543 |
| CDH1      | E-Cadherin-R-V        | 0.973167 | 1.596451 | 0.988034 | 1.566411 | 1.049367 | 2.090121 | 1.023635 | 1.001923 |
| CDH2      | N-Cadherin-R-V        | 1.038915 | 0.97486  | 0.994233 | 0.981214 | 0.931245 | 0.979967 | 0.951545 | 0.976049 |
| CDH3      | P-Cadherin-R-C        | 1.108432 | 0.920945 | 1.002164 | 0.988071 | 0.999567 | 1.450673 | 1.072355 | 1.049536 |
| CDK1      | Cdc2_pY15-R-C         | 0.940782 | 0.950386 | 1.019952 | 1.032403 | 1.020247 | 1.001659 | 0.99752  | 0.989899 |
| CDK1      | CDK1-R-C              | 1.121691 | 1.027811 | 1.286786 | 0.978428 | 0.954192 | 0.916754 | 0.960528 | 0.937704 |
| CDKN1A    | p21-R-V               | 0.981824 | 0.93397  | 1.004876 | 0.999564 | 0.986102 | 0.999054 | 1.013025 | 1.036731 |
| CDKN1B    | p27-Kip-1-R-V         | 1.01069  | 1.024718 | 0.988449 | 0.956261 | 1.000008 | 1.009064 | 1.014161 | 1.044059 |
| CDKN1B    | p27_pT198-R-V         | 1.027492 | 1.019947 | 0.999487 | 1.024225 | 1.025701 | 1.063635 | 1.042194 | 0.97961  |
| CDKN2A    | p16INK4a-R-V          | 0.853426 | 0.992478 | 0.877731 | 0.938822 | 0.850645 | 1.010702 | 1.039885 | 0.776443 |
| CHEK1     | Chk1_pS296-R-V        | 1.075685 | 1.04172  | 0.995629 | 1.125865 | 1.118648 | 1.296009 | 0.979348 | 0.958831 |



|             |                      |          |          |          |          |          |          |          |          |
|-------------|----------------------|----------|----------|----------|----------|----------|----------|----------|----------|
| CHEK2       | Chk2_pT68-R-C        | 0.995355 | 1.029483 | 1.008341 | 0.962511 | 1.099224 | 1.033217 | 1.042833 | 1.093369 |
| CLDN7       | Claudin-7-R-V        | 0.997127 | 1.036828 | 0.937468 | 0.966537 | 0.943346 | 1.024891 | 0.955505 | 1.007516 |
| CMC2        | Cox2-R-C             | 1.363531 | 1.029263 | 1.034877 | 1.019853 | 1.041749 | 0.972098 | 1.000352 | 1.685494 |
| CNST43      | Connexin-43-R-C      | 1.206623 | 1.149834 | 0.9408   | 1.31516  | 1.010602 | 1.57755  | 1.147176 | 1.080753 |
| COG3        | COG3-R-V             | 0.990516 | 0.99823  | 0.994118 | 1.028342 | 1.036777 | 1.015138 | 1.001571 | 1.030447 |
| COL6A1      | Collagen-VI-R-V      | 0.970223 | 0.94893  | 0.964489 | 1.000491 | 1.005216 | 0.992351 | 0.983093 | 1.008592 |
| CREB1       | Creb-R-C             | 1.058123 | 1.025253 | 0.97476  | 1.025878 | 1.009244 | 1.004299 | 1.164829 | 1.027859 |
| CTNNB1      | b-Catenin-R-V        | 0.978588 | 1.280913 | 0.960312 | 1.044749 | 0.80802  | 1.032179 | 0.995776 | 0.906335 |
| CTNNB1      | b-Catenin_pT41_S45-R | 0.994901 | 1.022772 | 1.03397  | 1.009114 | 1.028249 | 1.036895 | 1.039499 | 1.0157   |
| DPP4        | CD26-R-V             | 1.103579 | 0.925765 | 0.977203 | 1.114    | 0.925733 | 1.012987 | 0.868591 | 0.966593 |
| DUSP4       | DUSP4-R-V            | 0.908037 | 0.973485 | 1.054748 | 0.779942 | 1.080332 | 1.020101 | 1.04817  | 1.154169 |
| EEF2        | eEF2-R-C             | 0.988382 | 1.122267 | 1.120633 | 0.936306 | 0.87907  | 0.945779 | 0.939367 | 0.933633 |
| EEF2K       | eEF2K-R-V            | 0.943918 | 1.010566 | 1.032199 | 1.010959 | 0.905502 | 0.925857 | 0.996069 | 0.905378 |
| EGFR        | EGFR-R-V             | 1.065656 | 0.929291 | 0.987956 | 1.035343 | 0.988318 | 0.989248 | 0.985272 | 1.019123 |
| EGFR        | EGFR_pY1173-R-V      | 1.036077 | 1.013146 | 0.99843  | 0.992714 | 1.021258 | 1.043826 | 1.002432 | 0.984852 |
| EIF4E       | eIF4E-R-V            | 1.028201 | 1.036797 | 1.023151 | 1.052596 | 0.89193  | 0.921079 | 1.028833 | 0.960255 |
| EIF4E       | eIF4E_pS209-R-V      | 0.974322 | 1.051251 | 1.071179 | 1.001694 | 0.977157 | 0.949822 | 1.05291  | 0.984002 |
| EIF4EBP1    | 4E-BP1-R-V           | 1.109197 | 1.090708 | 0.976164 | 0.928586 | 0.93995  | 1.042831 | 1.036274 | 1.116943 |
| EIF4EBP1    | 4E-BP1_pS65-R-V      | 1.076697 | 1.033224 | 1.068254 | 1.054405 | 0.998496 | 1.086365 | 1.101288 | 1.025936 |
| EIF4G1      | eIF4G-R-C            | 0.970989 | 0.89273  | 1.182569 | 0.978726 | 0.942857 | 0.955451 | 0.996829 | 1.118789 |
| ELK1        | Elk1_pS383-R-C       | 1.08183  | 0.989736 | 1.048221 | 1.10281  | 0.966571 | 1.044625 | 0.975021 | 0.981161 |
| ERBB2       | HER2_pY1248-R-C      | 0.976285 | 1.01324  | 1.001655 | 1.037334 | 1.005412 | 1.017512 | 1.131384 | 0.963448 |
| ERBB3       | HER3-R-V             | 0.982093 | 0.938349 | 0.983806 | 0.993788 | 1.044495 | 1.05535  | 0.988409 | 1.003407 |
| ERBB3       | HER3_pY1289-R-C      | 1.038163 | 1.09832  | 0.993094 | 0.974046 | 0.980272 | 1.04304  | 1.053391 | 1.012085 |
| ERCC5       | ERCC5-R-C            | 1.000145 | 0.967645 | 1.081616 | 1.061475 | 0.895157 | 0.972402 | 0.961734 | 0.969803 |
| ESR1        | ER-R-V               | 0.966066 | 0.998602 | 1.030521 | 0.9828   | 1.148628 | 1.049679 | 1.049293 | 1.090151 |
| ESR1        | ER-a_pS118-R-V       | 1.022188 | 1.004106 | 1.002492 | 0.983731 | 0.979159 | 0.993284 | 1.00964  | 1.017373 |
| ETS1        | Ets-1-R-V            | 1.080966 | 1.047821 | 1.04524  | 0.975863 | 1.016978 | 0.970868 | 0.987395 | 0.970855 |
| FASN        | FASN-R-V             | 0.908189 | 1.025001 | 1.011519 | 0.99567  | 0.991487 | 0.980116 | 1.021212 | 0.945049 |
| FOSL1       | FRA-1-R-C            | 1.016404 | 1.015243 | 1.081156 | 1.063589 | 0.948802 | 0.929478 | 1.034517 | 0.955211 |
| FOX3        | FoxO3a-R-C           | 1.010211 | 0.981182 | 0.915639 | 1.006123 | 1.081545 | 1.067335 | 1.018444 | 1.080888 |
| FOXO1       | FoxO1-R-V            | 0.975597 | 0.979629 | 1.050323 | 1.024664 | 0.976356 | 0.931405 | 0.988773 | 0.945793 |
| FOXO3       | FoxO3a_pS318_S321-R  | 1.084881 | 1.039042 | 0.9952   | 0.988261 | 1.011739 | 1.05607  | 1.005858 | 1.076883 |
| G6PD        | G6PD-R-V             | 1.015373 | 0.960793 | 1.03984  | 0.983773 | 1.052386 | 0.986421 | 1.025439 | 1.071477 |
| GAB2        | Gab2-R-V             | 0.984914 | 1.012447 | 0.975514 | 1.046581 | 0.986044 | 0.951474 | 0.955964 | 0.935589 |
| GCLM        | GCLM-R-C             | 1.02463  | 0.925702 | 1.048531 | 0.993768 | 1.073222 | 0.992579 | 0.967608 | 1.054444 |
| GLS         | Glutaminase-R-C      | 0.961174 | 1.011682 | 1.015428 | 0.9528   | 1.006728 | 0.980383 | 0.989975 | 0.977744 |
| GLUD        | Glutamate-D1-2-R-C   | 1.013187 | 0.972924 | 1.020888 | 1.062815 | 1.077125 | 0.960232 | 0.934961 | 1.04907  |
| GSK3A GSK3B | GSK-3a-b_pS21_S9-R-V | 0.922592 | 1.152126 | 1.078796 | 1.202998 | 0.773848 | 0.879954 | 1.18051  | 0.837102 |
| GYS1        | Gys-R-V              | 0.999792 | 1.011095 | 1.291492 | 0.963434 | 1.203238 | 1.032072 | 1.219865 | 1.111869 |
| GYS1        | Gys_pS641-R-V        | 0.910752 | 1.056649 | 1.040636 | 1.046318 | 0.95548  | 1.006436 | 1.01689  | 0.969746 |
| GZMB        | Granzyme-B-R-V       | 1.027621 | 0.985575 | 1.027183 | 0.970054 | 1.03869  | 1.069818 | 0.990421 | 1.06034  |
| H3K9ME2     | DM-K9-Histone-H3-R-C | 1.123933 | 1.033671 | 0.907476 | 0.981373 | 1.247401 | 1.317265 | 0.992049 | 1.066535 |
| HES1        | HES1-R-V             | 1.167551 | 1.275676 | 1.133594 | 1.329781 | 0.88739  | 1.104366 | 0.993514 | 1.034475 |
| HIST3H3     | Histone-H3-R-V       | 1.092672 | 1.17281  | 1.10228  | 0.910076 | 1.044228 | 1.207641 | 0.930151 | 1.017277 |
| HISTH3      | DM-Histone-H3-R-V    | 1.230614 | 1.072752 | 0.937285 | 1.00637  | 1.008689 | 1.079219 | 0.988399 | 1.050779 |
| HK2         | Hexokinase-II-R-V    | 1.004349 | 0.945831 | 0.961582 | 0.974906 | 0.962534 | 0.982172 | 1.013285 | 0.967915 |
| HSBP1       | HSP27_pS82-R-V       | 1.015617 | 0.996914 | 1.0429   | 0.951082 | 0.91118  | 0.887018 | 0.960965 | 0.93166  |
| HSPA1A      | HSP70-R-C            | 1.054929 | 1.029002 | 1.212229 | 0.994333 | 0.987386 | 1.175016 | 0.924071 | 0.893224 |
| IGF1R       | IGF1R_pY1135_Y1136-I | 0.942855 | 0.978167 | 1.008018 | 0.95576  | 1.059376 | 0.999462 | 1.002943 | 1.029672 |
| IGF1R       | IGFRb-R-C            | 1.001235 | 1.026124 | 0.919145 | 1.091104 | 0.950131 | 0.939804 | 0.962192 | 0.912124 |
| IGFBP2      | IGFBP2-R-V           | 1.056553 | 1.077487 | 1.019093 | 1.007536 | 1.016933 | 1.059293 | 1.029099 | 1.020415 |
| INPP4B      | INPP4b-R-V           | 0.988146 | 1.016625 | 1.017959 | 1.018841 | 1.033028 | 0.987704 | 1.003277 | 0.991522 |
| INSRB       | IR-b-R-C             | 0.976052 | 1.086582 | 1.030002 | 1.023565 | 1.026507 | 0.982345 | 1.037833 | 1.053624 |
| IRF1        | IRF-1-R-C            | 0.99538  | 0.947762 | 0.911268 | 0.953485 | 1.140061 | 1.01348  | 1.042558 | 0.959633 |

|        |                        |          |          |          |          |          |          |          |          |
|--------|------------------------|----------|----------|----------|----------|----------|----------|----------|----------|
| IRS1   | IRS1-R-V               | 1.056981 | 0.999617 | 0.960163 | 0.995236 | 0.956619 | 0.954788 | 0.954538 | 1.037378 |
| JAG1   | Jagged1-R-V            | 1.06226  | 1.024966 | 1.011495 | 1.122358 | 1.075787 | 1.065419 | 0.998338 | 1.025244 |
| JAK2   | Jak2-R-V               | 0.965974 | 1.084306 | 1.118251 | 0.994965 | 1.00616  | 1.079728 | 1.027996 | 0.98154  |
| JUN    | c-Jun_pS73-R-V         | 0.984176 | 0.948822 | 1.106087 | 1.071014 | 1.023026 | 1.025385 | 1.058502 | 1.005552 |
| KAT2A  | GCN5L2-R-V             | 0.959297 | 1.029626 | 1.023474 | 0.994716 | 1.01641  | 1.05232  | 1.029333 | 0.961598 |
| KDR    | VEGFR-2-R-V            | 1.074743 | 1.000969 | 0.91669  | 0.966984 | 1.034853 | 1.044936 | 1.081608 | 1.089117 |
| KIT    | c-Kit-R-V              | 1.01614  | 1.029045 | 1.048424 | 0.933267 | 0.977755 | 0.950166 | 1.003411 | 1.054523 |
| LC3AB  | LC3A-B-R-C             | 0.934978 | 0.993398 | 1.122785 | 0.93445  | 1.196781 | 0.989095 | 1.058478 | 1.168514 |
| LCK    | Lck-R-V                | 0.981688 | 1.030387 | 1.002566 | 1.049892 | 1.238403 | 1.228269 | 1.041606 | 0.982012 |
| LDHA   | LDHA-R-C               | 1.053099 | 1.022578 | 1.205585 | 0.915491 | 0.991538 | 1.117685 | 1.085191 | 1.106905 |
| LRP6   | LRP6_pS1490-R-V        | 0.984966 | 0.979571 | 1.007334 | 1.07012  | 1.04741  | 1.005954 | 1.002104 | 1.014898 |
| MAP2K1 | MEK1-R-V               | 1.097221 | 0.932352 | 1.036104 | 1.157119 | 0.775029 | 0.769141 | 0.958605 | 0.864133 |
| MAP2K1 | MEK1_pS217_S221-R-V    | 0.948817 | 1.100638 | 1.066088 | 1.044879 | 0.977873 | 1.009796 | 1.040292 | 1.00454  |
| MAPK14 | p38-MAPK-R-V           | 0.910932 | 0.987311 | 0.981231 | 0.974115 | 0.932492 | 0.969706 | 0.978339 | 1.012669 |
| MAPK14 | p38_pT180_Y182-R-V     | 0.928228 | 1.058619 | 1.267379 | 1.249624 | 0.750871 | 0.786546 | 1.124068 | 0.793626 |
| MAPK3  | MAPK_pT202_Y204-R-V    | 0.896283 | 0.99355  | 1.041596 | 1.125684 | 0.979556 | 0.973448 | 1.077852 | 0.905937 |
| MAPK3  | p44-42-MAPK-R-V        | 0.957978 | 1.083903 | 1.001508 | 0.956409 | 1.06753  | 1.028506 | 0.974375 | 1.023242 |
| MAPK8  | JNK_pT183_Y185-R-V     | 1.014069 | 0.976343 | 0.994701 | 0.99205  | 1.035963 | 1.024781 | 1.022724 | 0.983648 |
| MAPK9  | JNK2-R-C               | 1.003294 | 1.006814 | 0.856555 | 0.973624 | 0.836908 | 1.139811 | 0.975847 | 1.040261 |
| MCL1   | Mcl-1-R-V              | 0.976061 | 1.170339 | 1.125842 | 1.047297 | 0.930832 | 0.927989 | 0.899324 | 0.953936 |
| MDM2   | MDM2_pS166-R-V         | 0.990122 | 1.860778 | 1.105984 | 2.171343 | 0.880904 | 1.966616 | 0.961744 | 0.914736 |
| MET    | c-Met_pY1234_Y1235-R-V | 1.02229  | 1.007306 | 0.96261  | 1.006681 | 1.031957 | 1.056722 | 1.033949 | 1.017383 |
| MIF    | MIF-R-C                | 0.979346 | 0.961014 | 0.985555 | 0.921588 | 1.08827  | 1.066462 | 1.051553 | 1.128648 |
| MKNK1  | Mnk1-R-V               | 0.911067 | 1.012211 | 1.023859 | 0.976009 | 1.016188 | 0.964315 | 1.028482 | 0.934533 |
| MMP2   | MMP2-R-V               | 1.102749 | 0.990763 | 1.003917 | 1.061974 | 1.033225 | 1.065993 | 0.995583 | 1.040035 |
| MSH6   | MSH6-R-C               | 1.056774 | 0.97641  | 1.050437 | 1.01668  | 0.919718 | 0.922361 | 0.961215 | 0.996655 |
| MSI2   | MSI2-R-C               | 0.969564 | 1.06651  | 0.983591 | 0.976609 | 1.005269 | 0.979333 | 0.984397 | 1.065629 |
| MTOR   | mTOR-R-V               | 0.941419 | 1.034991 | 1.07527  | 0.986565 | 0.943119 | 0.899853 | 0.955821 | 0.90377  |
| MTOR   | mTOR_pS2448-R-C        | 0.970293 | 1.227335 | 1.071898 | 1.087804 | 0.892071 | 0.982738 | 1.034651 | 0.901649 |
| MYC    | c-Myc-R-C              | 0.975323 | 0.937744 | 0.984433 | 1.029174 | 1.019726 | 1.012194 | 1.016801 | 0.954299 |
| MYH11  | Myosin-11-R-V          | 1.03922  | 1.713902 | 1.413303 | 1.726363 | 1.712908 | 1.510167 | 1.250285 | 1.374309 |
| MYO2A  | Myosin-IIa_pS1943-R-V  | 0.98949  | 1.010455 | 1.246036 | 0.975619 | 0.868343 | 0.981308 | 1.038427 | 1.066248 |
| MYT1   | Myt1-R-C               | 0.977952 | 0.952959 | 0.988737 | 0.986391 | 1.075451 | 1.002871 | 1.004162 | 1.021997 |
| NAPSA  | NAPSIN-A-R-C           | 1.015112 | 0.988527 | 1.004406 | 0.997084 | 1.035675 | 1.024588 | 0.995964 | 1.017076 |
| NDRG1  | NDRG1_pT346-R-V        | 0.888807 | 0.890909 | 0.886342 | 0.876024 | 1.049455 | 0.950044 | 1.304986 | 1.274461 |
| NF2    | Merlin-R-C             | 1.009932 | 1.139071 | 1.062381 | 0.980203 | 1.022382 | 1.034864 | 1.063304 | 1.01853  |
| NFKB1  | NF-kB-p65_pS536-R-C    | 1.085195 | 1.030409 | 1.056778 | 1.095601 | 0.851888 | 0.918909 | 1.017769 | 0.901325 |
| NOTCH1 | Notch1-R-V             | 0.957989 | 1.71908  | 1.025962 | 1.853569 | 0.854686 | 1.776717 | 0.938033 | 0.883092 |
| NOTCH3 | Notch3-R-C             | 0.997932 | 0.93388  | 1.008563 | 1.042701 | 1.06868  | 1.057082 | 0.960056 | 1.016481 |
| NRG1   | Heregulin-R-V          | 1.105826 | 1.095    | 1.404855 | 1.143125 | 1.063531 | 1.085913 | 1.00604  | 1.011824 |
| PAICS  | PAICS-R-C              | 1.126357 | 0.983653 | 1.012803 | 0.957981 | 1.020961 | 1.125149 | 1.012667 | 1.226657 |
| PAK1   | PAK1-R-V               | 0.986884 | 0.954125 | 1.019658 | 1.020862 | 0.999704 | 1.013397 | 1.010326 | 1.074701 |
| PAK4   | PAK4-R-V               | 0.968474 | 1.005458 | 1.023701 | 0.971983 | 1.011549 | 0.986405 | 1.004703 | 0.98497  |
| PAR    | PAR-R-C                | 1.350641 | 1.131913 | 1.321331 | 1.680184 | 0.745873 | 0.882249 | 1.160371 | 1.113613 |
| PARK7  | DJ1-R-V                | 1.063256 | 1.077244 | 1.063736 | 0.945718 | 1.118781 | 1.189969 | 1.108459 | 1.201955 |
| PARP1  | PARP1-R-V              | 1.050838 | 0.988895 | 0.999345 | 1.026306 | 1.035447 | 1.058333 | 1.042799 | 0.928401 |
| PAX8   | PAX8-R-C               | 0.982112 | 1.007668 | 1.008463 | 0.989922 | 1.014388 | 0.973772 | 0.989091 | 0.990117 |
| PDCD1  | Pdcd-1L1-G-C           | 1.032464 | 0.84388  | 1.050398 | 1.01026  | 1.189037 | 0.981316 | 0.978435 | 1.380778 |
| PDCD4  | Pdcd4-R-C              | 0.899663 | 0.985431 | 0.897379 | 0.988009 | 1.075025 | 1.088353 | 1.030555 | 1.085161 |
| PDGFR  | PDGFR-b-R-V            | 1.053501 | 1.095862 | 0.991687 | 1.033038 | 1.06593  | 0.967366 | 1.063182 | 1.108978 |
| PDHK1  | PDHK1-R-C              | 0.96961  | 0.980418 | 1.032016 | 0.995249 | 1.094095 | 1.014811 | 1.028985 | 1.041232 |
| PDK1   | PDK1-R-V               | 1.063852 | 1.031043 | 1.170364 | 1.021512 | 1.023742 | 1.088809 | 1.052281 | 1.015143 |
| PDK1   | PDK1_pS241-R-V         | 0.931558 | 1.004857 | 0.966294 | 0.9247   | 1.081149 | 1.067421 | 1.044788 | 1.022166 |
| PEA15  | PEA-15-R-V             | 1.106114 | 1.127918 | 0.956666 | 0.97877  | 0.93715  | 0.905604 | 0.957493 | 1.067193 |
| PEA15  | PEA-15_pS116-R-V       | 0.962795 | 0.995471 | 0.944685 | 0.957068 | 1.019194 | 0.981819 | 1.086365 | 1.04379  |

|         |                     |          |          |          |          |          |          |          |          |
|---------|---------------------|----------|----------|----------|----------|----------|----------|----------|----------|
| PGR     | PR-R-V              | 1.112315 | 1.073455 | 0.99094  | 1.076898 | 1.039847 | 1.064765 | 1.00726  | 1.034582 |
| PIK3C2A | PI3K-p110-a-R-C     | 0.99185  | 1.004587 | 1.024691 | 0.951275 | 1.024182 | 1.086798 | 1.031904 | 1.090813 |
| PIK3R1  | PI3K-p85-R-V        | 0.978181 | 0.970791 | 0.983625 | 0.958317 | 1.067884 | 1.103136 | 1.007461 | 1.063387 |
| PKM2    | PKM2-R-C            | 1.074474 | 1.290118 | 1.103493 | 0.988783 | 1.083049 | 1.088734 | 1.115131 | 1.158991 |
| PLCG2   | PLC-gamma2_pY759-R- | 0.973576 | 0.963552 | 0.953141 | 1.020892 | 1.003371 | 0.975341 | 0.986093 | 0.97661  |
| PLK1    | PLK1-R-C            | 1.097213 | 1.098898 | 1.346585 | 1.179484 | 0.910999 | 0.863887 | 0.996231 | 0.851887 |
| PMS2    | PMS2-R-V            | 0.923055 | 1.003405 | 1.011793 | 0.997175 | 0.992295 | 0.978903 | 1.013573 | 0.947218 |
| PREX1   | PREX1-R-V           | 0.931274 | 0.918586 | 0.940901 | 0.891073 | 1.027895 | 1.005824 | 1.0446   | 1.106204 |
| PRKAA1  | AMPKa-R-C           | 1.08031  | 0.997085 | 1.008198 | 1.090584 | 0.925123 | 1.037217 | 0.953602 | 0.922635 |
| PRKAA1  | AMPKa_pT172-R-C     | 1.146611 | 1.204647 | 1.167827 | 1.076134 | 0.969718 | 1.011963 | 0.961278 | 1.012834 |
| PRKAA2  | AMPK-a2_pS345-R-V   | 1.01998  | 1.013733 | 1.004934 | 0.995072 | 1.010583 | 1.055475 | 1.015332 | 1.004234 |
| PRKAR1A | PKA-a-R-V           | 0.938373 | 0.980368 | 0.999312 | 0.904243 | 0.861707 | 0.865051 | 0.978646 | 0.890096 |
| PRKCA   | PKC-a_pS657-R-C     | 0.974892 | 1.03141  | 0.9551   | 0.950713 | 1.118283 | 1.097259 | 1.131727 | 1.095477 |
| PRKCB   | PKC-b-II_pS660-R-V  | 0.829372 | 0.95762  | 0.989423 | 1.001505 | 1.039591 | 1.015462 | 1.029996 | 0.939972 |
| PRKCD   | PKC-delta_pS664-R-V | 1.002788 | 0.9872   | 0.972855 | 0.978406 | 1.015453 | 1.023177 | 1.018041 | 1.023229 |
| PTEN    | PTEN-R-V            | 1.010816 | 1.111543 | 1.034649 | 1.040755 | 0.914828 | 0.93089  | 0.972087 | 0.890526 |
| PTGS3   | Cox-IV-R-V          | 1.223499 | 0.975798 | 0.866259 | 1.209878 | 0.946175 | 1.101653 | 0.926294 | 1.179583 |
| PTK2    | FAK-R-C             | 1.095186 | 0.998062 | 0.994316 | 0.9688   | 0.929814 | 0.985164 | 1.008389 | 1.010814 |
| PTK2    | FAK_pY397-R-V       | 1.023605 | 0.976708 | 1.032471 | 1.196028 | 0.882878 | 0.894584 | 1.140886 | 0.924833 |
| PTPN11  | SHP-2_pY542-R-C     | 0.942575 | 0.942816 | 1.063096 | 1.104703 | 0.937509 | 0.99757  | 1.372143 | 0.980865 |
| PXN     | Paxillin-R-C        | 1.054581 | 0.950749 | 1.015051 | 1.00855  | 0.975697 | 1.053023 | 1.066576 | 1.114751 |
| RAB11A  | Rab11-R-E           | 1.022363 | 0.991452 | 0.943965 | 1.003899 | 1.009069 | 0.972217 | 0.966119 | 1.076675 |
| RAB25   | Rab25-R-V           | 1.012516 | 1.057193 | 1.01178  | 1.038848 | 1.040145 | 1.008275 | 1.009004 | 1.035431 |
| RAD51   | Rad51-R-V           | 0.919622 | 0.915378 | 1.022153 | 0.994345 | 1.109812 | 1.00299  | 0.970366 | 0.983336 |
| RAF1    | C-Raf-R-C           | 0.964813 | 0.94582  | 1.021611 | 0.972585 | 0.998098 | 1.013981 | 0.993451 | 0.960377 |
| RAF1    | C-Raf_pS338-R-V     | 1.01902  | 1.023139 | 1.057354 | 1.038487 | 1.035582 | 1.084501 | 1.023472 | 1.009707 |
| RB1     | Rb_pS807_S811-R-V   | 0.945053 | 0.881224 | 1.336879 | 0.917567 | 1.057953 | 1.090145 | 1.248469 | 1.030754 |
| RBM15   | RBM15-R-V           | 0.971232 | 0.994982 | 1.023314 | 1.005015 | 1.071826 | 1.06394  | 1.025944 | 1.010206 |
| RICTOR  | Rictor-R-C          | 0.964494 | 1.013557 | 0.97064  | 1.048119 | 0.97733  | 0.931402 | 0.998242 | 0.983558 |
| RICTOR  | Rictor_pT1135-R-V   | 1.020633 | 0.970958 | 0.992538 | 1.04578  | 0.984294 | 0.993576 | 0.973378 | 0.955802 |
| RIP     | RIP-R-C             | 0.930815 | 1.023723 | 0.991421 | 0.94486  | 0.987507 | 0.941889 | 1.00299  | 1.001029 |
| ROCK1   | Rock-1-R-C          | 0.968799 | 1.070527 | 1.247206 | 0.943013 | 1.116855 | 1.003183 | 1.085258 | 1.153896 |
| RPA2    | RPA32_pS4_S8-R-C    | 0.91229  | 0.900222 | 1.044892 | 0.932074 | 0.890956 | 0.939207 | 0.989416 | 0.937212 |
| RPS6    | S6_pS235_S236-R-V   | 0.931621 | 1.079099 | 1.524552 | 1.243025 | 1.071062 | 1.032852 | 1.138579 | 1.019633 |
| RPS6    | S6_pS240_S244-R-V   | 0.918942 | 1.120212 | 1.367842 | 1.183214 | 0.988895 | 1.021056 | 1.063544 | 0.968332 |
| RPS6K   | p90RSK_pT573-R-C    | 0.877293 | 0.970777 | 1.120581 | 1.145387 | 0.897416 | 0.931185 | 1.031386 | 0.866379 |
| RPS6KA1 | RSK-R-C             | 0.98532  | 0.98374  | 0.97081  | 1.008211 | 1.060272 | 1.051565 | 1.029365 | 1.016179 |
| RPS6KB1 | p70-S6K1-R-V        | 1.073425 | 1.058392 | 0.990985 | 1.056521 | 1.01287  | 1.112441 | 1.02655  | 1.062584 |
| RPS6KB1 | p70-S6K_pT389-R-V   | 1.08677  | 0.979302 | 0.957354 | 0.984434 | 1.018788 | 1.022192 | 0.993729 | 1.232492 |
| RPTOR   | Raptor-R-V          | 1.024263 | 1.035329 | 1.012247 | 0.993511 | 0.988687 | 0.998513 | 0.960089 | 0.95982  |
| SDHA    | SDHA-R-V            | 1.018392 | 1.01882  | 0.868464 | 0.993913 | 1.00203  | 1.044538 | 0.977864 | 1.058139 |
| SHC1    | Shc_pY317-R-V       | 0.979384 | 1.012139 | 0.98566  | 0.961584 | 0.983429 | 0.947876 | 0.986318 | 1.001578 |
| SLC16A4 | MCT4-R-V            | 1.004761 | 0.932682 | 0.873612 | 0.839771 | 1.009342 | 0.968821 | 1.114225 | 1.074789 |
| SLC1A5  | SLC1A5-R-C          | 1.075824 | 0.966047 | 1.109612 | 0.942736 | 0.852659 | 0.883285 | 1.003641 | 0.918039 |
| SMAD1   | Smad1-R-V           | 1.061435 | 1.146834 | 1.022926 | 1.102575 | 0.886048 | 0.912207 | 0.95789  | 0.913299 |
| SMAD3   | Smad3-R-V           | 1.100694 | 0.986572 | 0.991626 | 1.004983 | 0.980388 | 1.024208 | 0.961505 | 1.009331 |
| SOX2    | Sox2-R-V            | 1.2418   | 1.069425 | 1.238525 | 1.048101 | 0.978616 | 0.87472  | 0.936772 | 0.961059 |
| SRC     | Src_pY416-R-V       | 1.064255 | 1.012522 | 1.305688 | 1.585576 | 0.879116 | 1.03243  | 1.993558 | 0.897734 |
| SRC     | Src_pY527-R-V       | 0.959258 | 0.956685 | 1.125279 | 1.066348 | 0.969486 | 1.089332 | 1.2621   | 0.968128 |
| STAT    | Stat_pY694-R-N      | 0.98427  | 1.046618 | 1.017309 | 1.034609 | 1.138486 | 1.049198 | 1.097032 | 1.07505  |
| STAT3   | Stat3-R-C           | 0.943195 | 0.949839 | 1.048937 | 0.975958 | 1.001699 | 1.053431 | 0.947695 | 0.99704  |
| STAT3   | Stat3_pY705-R-V     | 0.960036 | 1.125685 | 0.973066 | 1.032438 | 1.039376 | 1.104244 | 1.070186 | 0.991933 |
| STAT5A  | Stat5a-R-V          | 0.987371 | 1.022071 | 0.980668 | 0.972184 | 0.980457 | 1.01322  | 0.996988 | 0.980654 |
| STMN1   | Stathmin-1-R-V      | 1.042716 | 0.962439 | 1.048468 | 1.004372 | 1.033891 | 1.035552 | 1.100918 | 1.122729 |
| TAZ     | TAZ-R-V             | 1.038054 | 1.051999 | 0.956792 | 1.00317  | 0.89113  | 0.880739 | 0.911377 | 1.039519 |

|         |                    |          |          |          |          |          |          |          |          |
|---------|--------------------|----------|----------|----------|----------|----------|----------|----------|----------|
| TFAM    | TFAM-R-V           | 1.112136 | 0.928589 | 0.939872 | 1.084099 | 0.99862  | 0.985939 | 0.954646 | 1.2164   |
| TFRC    | TFRC-R-V           | 1.118271 | 0.932168 | 1.151877 | 1.17562  | 0.94858  | 1.346546 | 0.83634  | 0.813875 |
| TIGAR   | TIGAR-R-V          | 1.028254 | 1.090833 | 1.027105 | 0.982485 | 1.026936 | 0.997098 | 0.987897 | 0.976983 |
| TP53    | p53-R-C            | 1.051784 | 1.04178  | 1.004503 | 1.07606  | 1.032962 | 0.938715 | 0.893713 | 0.997788 |
| TP53BP1 | 53BP1-R-V          | 0.9609   | 0.962368 | 1.000882 | 0.996879 | 1.096747 | 1.032839 | 1.012224 | 1.054239 |
| TRIM25  | TRIM25-R-C         | 1.036474 | 0.926527 | 0.975327 | 0.981092 | 0.986231 | 1.063371 | 1.043916 | 1.101322 |
| TSC1    | TSC1-R-C           | 1.005906 | 0.997142 | 1.001517 | 0.986424 | 1.010294 | 1.013328 | 0.98951  | 1.098595 |
| TSC2    | Tuberin-R-V        | 0.912213 | 0.978696 | 0.921904 | 0.943145 | 0.909952 | 0.954948 | 1.011134 | 0.997068 |
| TSC2    | Tuberin_pT1462-R-V | 1.014872 | 1.002998 | 0.996114 | 1.002974 | 0.997805 | 0.993942 | 0.96771  | 0.964165 |
| TTF1    | TTF1-R-V           | 1.076552 | 0.995674 | 1.072897 | 1.015842 | 0.995452 | 0.972492 | 0.976793 | 0.982951 |
| TUBA1A  | D-a-Tubulin-R-V    | 1.155317 | 1.120476 | 0.957415 | 1.107581 | 1.095842 | 1.134902 | 0.992725 | 1.145366 |
| TUFM    | TUFM-R-V           | 0.946302 | 1.011706 | 1.059823 | 0.990027 | 1.031472 | 0.964934 | 0.975498 | 1.066351 |
| TYRO3   | Tyro3-R-V          | 0.991842 | 0.998426 | 0.968183 | 0.999222 | 0.99937  | 1.039682 | 0.99777  | 0.955203 |
| UBAC1   | UBAC1-R-V          | 1.151327 | 1.046591 | 1.051964 | 1.020879 | 0.921612 | 0.961452 | 0.967442 | 1.035815 |
| ULK1    | ULK1_pS757-R-C     | 0.98151  | 1.116275 | 1.047449 | 0.94918  | 0.998627 | 1.006893 | 0.98035  | 0.999663 |
| VASP    | VASP-R-V           | 1.035989 | 1.0178   | 0.983387 | 1.028158 | 0.969585 | 0.956973 | 0.954753 | 0.991773 |
| VTCN1   | B7-H4-R-C          | 0.948329 | 1.061588 | 1.057588 | 1.01611  | 1.10609  | 1.05672  | 1.102746 | 1.059894 |
| WEE1    | Wee1-R-C           | 0.950997 | 0.924727 | 0.989951 | 0.977585 | 1.014368 | 0.992224 | 1.003196 | 0.976269 |
| WIPI1   | WIPI1-R-C          | 0.915829 | 0.982794 | 1.046674 | 1.056311 | 1.060251 | 0.980756 | 1.061343 | 0.952759 |
| WIPI2   | WIPI2-R-C          | 0.953468 | 1.03576  | 0.927222 | 0.93252  | 0.92508  | 0.912755 | 1.04705  | 1.294715 |
| XBP1    | XBP-1-G-C          | 0.955304 | 0.978443 | 1.079112 | 0.898542 | 1.05514  | 0.940129 | 0.98076  | 1.210101 |
| XRCC1   | XRCC1-R-C          | 1.009484 | 1.030772 | 0.993237 | 0.970252 | 0.993294 | 0.974061 | 0.998741 | 1.055963 |
| YAP1    | YAP-R-E            | 0.993684 | 0.907218 | 1.01452  | 0.968016 | 1.007673 | 0.979642 | 1.004744 | 1.128608 |
| YAP1    | YAP_pS127-R-E      | 1.022268 | 0.983659 | 1.011046 | 0.969642 | 0.99592  | 1.077889 | 1.139211 | 1.323482 |
| YBX1    | YB1_pS102-R-V      | 1.051744 | 0.984728 | 1.071757 | 1.02142  | 0.962543 | 1.010605 | 0.977308 | 1.003726 |
| YWHAB   | 14-3-3-beta-R-V    | 1.06474  | 1.019279 | 1.043003 | 1.010208 | 1.053866 | 1.035405 | 0.996302 | 1.186256 |
| YWHAZ   | 14-3-3-zeta-R-V    | 1.015863 | 1.045188 | 1.049055 | 0.979129 | 1.132682 | 1.126908 | 1.001068 | 1.122446 |
| ZAP70   | ZAP-70-R-C         | 0.985663 | 0.957963 | 1.021957 | 1.052013 | 1.219512 | 1.275236 | 1.017241 | 1.054687 |

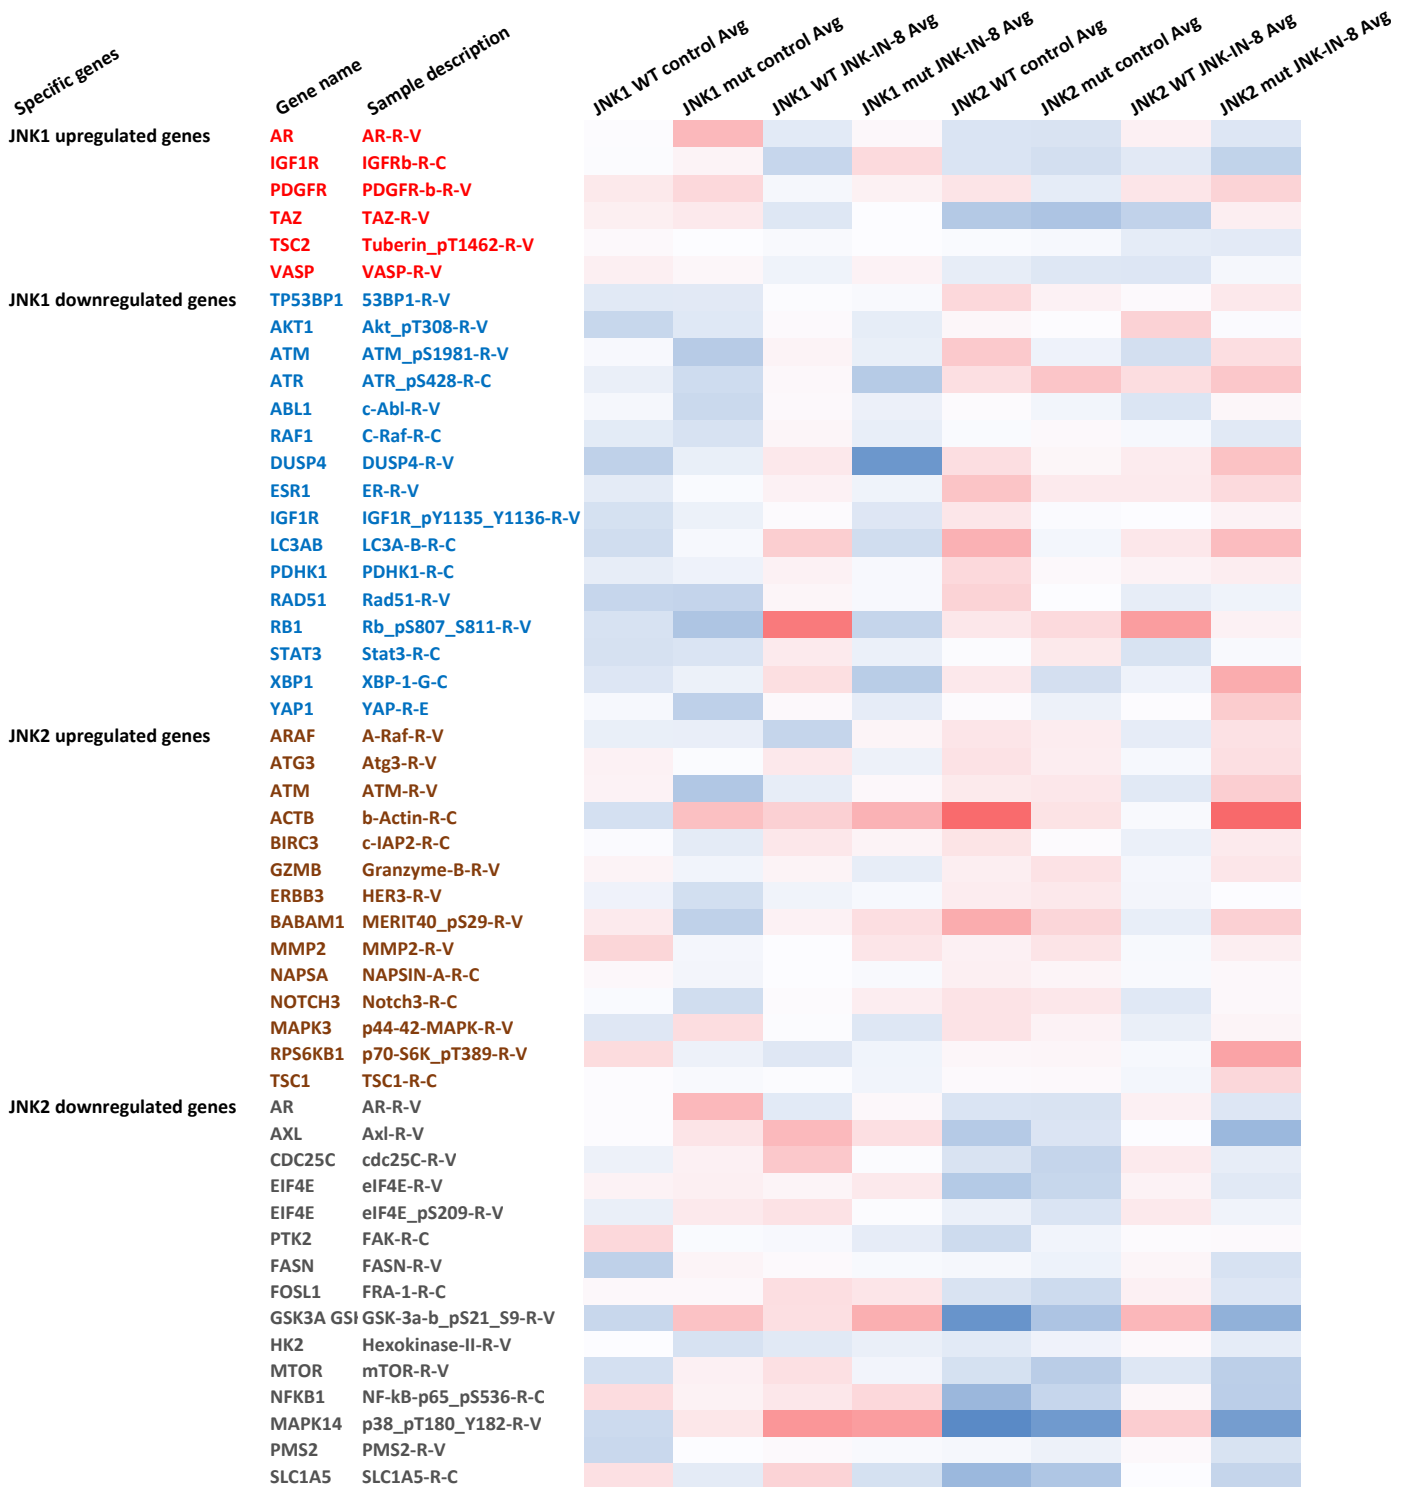

**Supplementary Table 1.** Reverse Phase Protein Array (RPPA) analysis suggests distinct JNK1 vs JNK2-regulated proteins

Normalized RPPA data is presented in Tab 1. To assess whether intact JNK1 and JNK2 activity was individually associated with expression of distinct sets of proteins and phospho-proteins within tumors. For this analysis, we identified proteins that were up- or down-regulated in both WT and C116S mutants of JNK1/2 in the absence of JNK-IN-8. Proteins that changed in common between JNK1 and JNK2 were then removed from further consideration. We then focused on proteins for which levels changed in control-treated tumors in a manner that could be suppressed by JNK-IN-8 administration, but retained in JNK1/2<sup>C116S</sup> expressing tumors in the context of JNK-IN-8. This is a significantly smaller set of proteins, but JNK1-specific changes were observed in 22 proteins and JNK2-specific changes in 29 proteins. The heatmap of normalized levels for these proteins is shown in Tab 2.

**Supplementary Table 2. The role of JNK1 vs. JNK2 in BRAFi resistance**

| M229R                 | DMSO         |             | JNK-IN-8             |                     |
|-----------------------|--------------|-------------|----------------------|---------------------|
|                       | Log(IC50)    | Emax        | Log(IC50)            | Emax                |
| GFP                   | -7.36 ± 0.28 | 0.14 ± 0.01 | -7.80 ± 0.19<br>**   | 0.26 ± 0.02<br>**** |
| JNK1 <sup>WT</sup>    | -7.80 ± 0.23 | 0.25 ± 0.02 | -7.90 ± 0.17         | 0.30 ± 0.02<br>**** |
| JNK1 <sup>C116S</sup> | -7.47 ± 0.18 | 0.24 ± 0.01 | -7.93 ± 0.17<br>***  | 0.31 ± 0.02<br>**** |
| JNK2 <sup>WT</sup>    | -7.99 ± 0.28 | 0.19 ± 0.02 | -7.23 ± 0.17<br>**** | 0.28 ± 0.02<br>**** |
| JNK2 <sup>C116S</sup> | -7.84 ± 0.21 | 0.22 ± 0.01 | -8.14 ± 0.28         | 0.20 ± 0.02         |

  

| SK-MEL28R             | DMSO         |             | JNK-IN-8             |                    |
|-----------------------|--------------|-------------|----------------------|--------------------|
|                       | Log(IC50)    | Emax        | Log(IC50)            | Emax               |
| GFP                   | -5.65 ± 0.19 | 0.61 ± 0.06 | -7.56 ± 0.23<br>**** | 0.53 ± 0.03        |
| JNK1 <sup>WT</sup>    | -6.82 ± 0.18 | 0.49 ± 0.03 | -8.75 ± 0.17<br>**** | 0.52 ± 0.02        |
| JNK1 <sup>C116S</sup> | -6.77 ± 0.14 | 0.54 ± 0.02 | -8.26 ± 0.08<br>**** | 0.55 ± 0.01        |
| JNK2 <sup>WT</sup>    | -7.24 ± 0.19 | 0.45 ± 0.03 | -8.50 ± 0.18<br>**** | 0.58 ± 0.03<br>*** |
| JNK2 <sup>C116S</sup> | -6.66 ± 0.07 | 0.61 ± 0.01 | -6.79 ± 0.12         | 0.56 ± 0.04        |

\*  $p \leq 0.05$ , \*\*  $p \leq 0.01$ , \*\*\*\*  $p \leq 0.001$ , \*\*\*\*  $P \leq 0.0001$ , JNK-IN-8 versus DMSO within groups.  
Log(IC50): Log value of half maximal inhibitory concentration (IC50)

BRAFi-resistant melanoma cell lines transduced with JNK1/2<sup>WT</sup> and JNK1/2<sup>C116S</sup> were treated with increasing concentrations of dabrafenib in the presence or absence of JNK-IN-8 for 72 hours as described under *Materials and Methods*. Full dose response curves were fit in GraphPad using a standard four parameter logistic regression fit in which both IC50 and Emax were estimated. In the m229R cells, which exhibited the highest level of phospho-JNK and phospho-c-JUN, JNK-IN-8 increased the Emax in all derivative lines with the exception of the one expressing JNK2<sup>C116S</sup>. In the SK-MEL28R cells, JNK-IN-8 decreased the IC50 in all derivative lines with the exception of the one expressing JNK2<sup>C116S</sup>.
